# Supplementary material
Source: MDPI journal article supplement (https://www.mdpi.com/2673-3943/2/1/3)
Supplement: s1 [file s1]

# Supplementary Materials: Urological Complications in Kidney Transplant Recipients: Analysis of the Risk Factors and Impact on Transplant Outcomes in the Era of “Extended Criteria Donors”

Roberta Angelico, Marco Pellicciaro, Francesca Venza, Tommaso Maria Manzia \*, Roberto Cacciola, Alessandro Anselmo, Luca Toti, Andrea Monaco, Giuseppe Iaria and Giuseppe Tisone

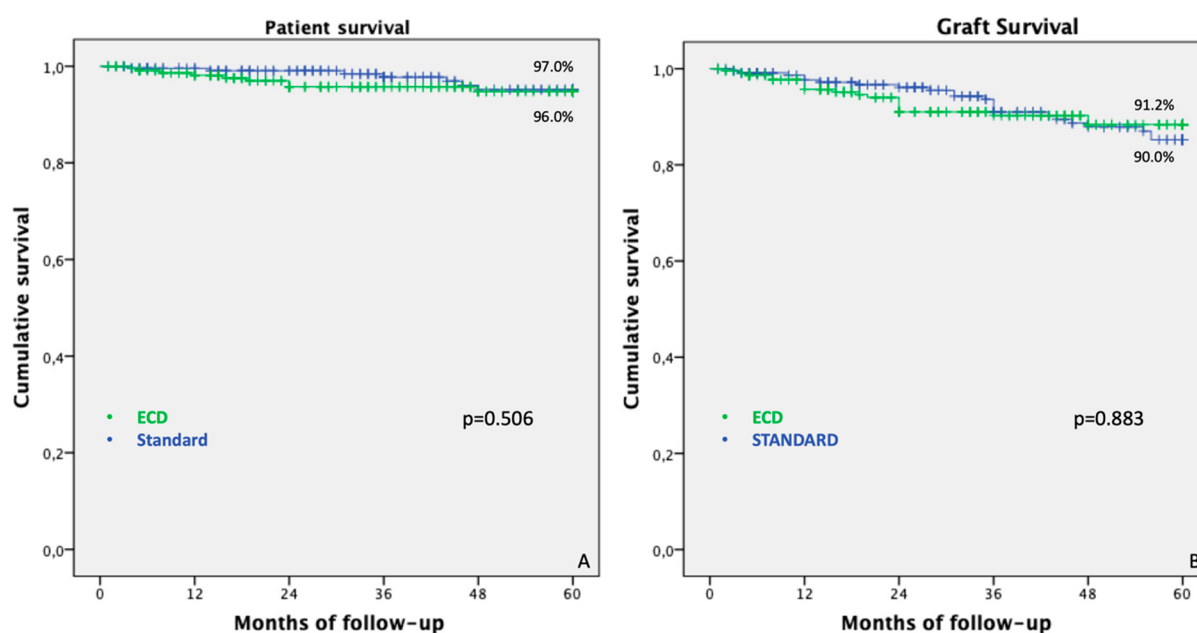

**Figure S1.** Five years graft and patient’s survival in patients transplanted with ECD graft, showing that the use of grafts from ECD didn’t increase risk of patient and graft failure. Abbreviations. ECD: extended criteria donor.
